# Supplementary material for: Evaluation of a Physical Activity and Multi-Micronutrient Intervention on Cognitive and Academic Performance in South African Primary Schoolchildren
Source: MDPI journal article supplement (doi:10.3390/nu14132609), 2022-06-23
Supplement: s1 [file s1]

**Table S1.** Intervention arms<sup>1</sup> at 4 primary schools in Nelson Mandela Bay, South Africa carried out between April 2019 and September 2019.

| School | Grade level  |              |              |              |
|--------|--------------|--------------|--------------|--------------|
|        | 1            | 2            | 3            | 4            |
| 1      | PA + Placebo | PA + MMNS    | MMNS         | Placebo      |
| 2      | Placebo      | PA + Placebo | PA + MMNS    | MMNS         |
| 3      | MMNS         | Placebo      | PA + Placebo | PA + MMNS    |
| 4      | PA + MMNS    | MMNS         | Placebo      | PA + Placebo |

Notes. <sup>1</sup> PA = Physical activity, MMNS = Multi-micronutrient supplementation, Placebo = Placebo control-group condition.

**Table S2.** Composition of the MMNS used in the intervention study.

| Nutrient                                        | Amount per tablet (mg)          | Overage <sup>1</sup> % |
|-------------------------------------------------|---------------------------------|------------------------|
| $\beta$ -carotene (Provitamin A)                | 3600 (equiv. to 2000 IU Vit. A) | 60%                    |
| Cholecalciferol (Vit. D <sub>3</sub> )          | 0.010                           | 60%                    |
| Rac- $\alpha$ -tocopherylacetate, TE-3 (Vit. E) | 9.0                             | 60%                    |
| Thiamine (Vit. B <sub>1</sub> )                 | 1.1                             | 60%                    |
| Riboflavin (Vit. B <sub>2</sub> )               | 0.5                             | 60%                    |
| Pyridoxine (Vit. B <sub>6</sub> )               | 0.5                             | 60%                    |
| Folic acid (Vit. B <sub>9</sub> )               | 0.2                             | 60%                    |
| Niacin (Vit. B <sub>3</sub> )                   | 8.0                             | 60%                    |
| Vitamin B <sub>12</sub>                         | 0.0012                          | 60%                    |
| Ascorbic acid (Vit. C)                          | 60                              | 60%                    |
| Iron (as NsFeEDTA)                              | 8.0                             | 60%                    |
| Iodite                                          | 0.1                             | 60%                    |
| Selenium                                        | 0.02                            | 60%                    |
| Zinc                                            | 5.0                             | 60%                    |
| Carrier <sup>2</sup>                            |                                 |                        |

Notes. <sup>1</sup> Overage of 60% were added to ensure required amounts during 12-month shelf life. <sup>2</sup> Carrier is used to indicate that the amount of carrier needed to have a total of 1 kg/kg was added. Vit. = Vitamin, equiv. = equivalent, NsFeEDTA = sodium ferric ethylenediaminetetraacetate.
